# Supplementary material
Source: Royal Society of Chemistry journal article supplement (doi:10.1039/d6dt00887a)
Supplement: d6dt00887a1.pdf [file d6dt00887a1.pdf]

## Supporting Information

### Doubly Reduced Phthalocyanine Complexes of V(IV), Cu(II), and Sn(II):

### Synthesis, Structure, and Spin Dynamics

Maxim A. Faraonov,<sup>a,\*</sup> Nikita R. Romanenko,<sup>a</sup> Timur E. Ivanov,<sup>a,b</sup> Alexandr S. Shmakov,<sup>a,b</sup>  
Aleksandr V. Akimov,<sup>a</sup> Alexey V. Kuzmin,<sup>c</sup> Salavat S. Khasanov,<sup>c</sup> Akihiro Otsuka,<sup>d</sup> Hiroshi  
Kitagawa,<sup>d</sup> Dmitri V. Konarev<sup>a,\*</sup>

<sup>a</sup>Federal Research Center of Problems of Chemical Physics and Medicinal Chemistry RAS, Chernogolovka, Moscow region, 142432, Russia;

<sup>b</sup>Faculty of Fundamental Physical and Chemical Engineering, Lomonosov Moscow State University, 119991 Moscow, Russia;

<sup>c</sup>Institute of Solid State Physics RAS, Chernogolovka, Moscow region, 142432 Russia;

<sup>d</sup>Division of Chemistry, Graduate School of Science, Kyoto University, Sakyo-ku, Kyoto 606-8502, Japan.

\* *Corresponding author E-mails: maksimfaraonov@yandex.ru, konarev3@yandex.ru*

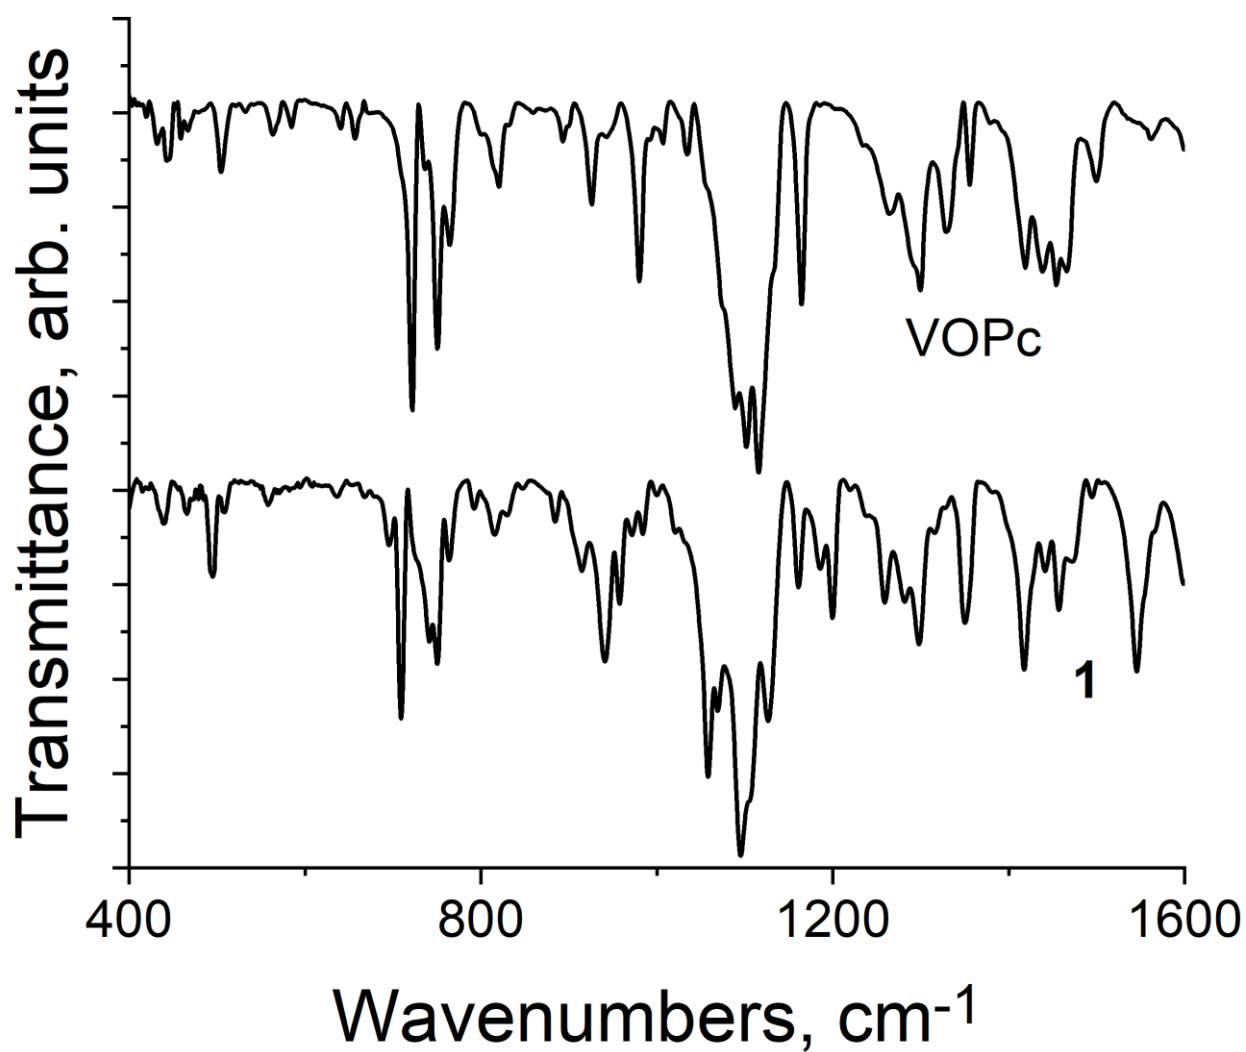

**Figure S1.** IR spectra of starting VOPc and complex **1** in KBr pellets prepared in anaerobic condition.

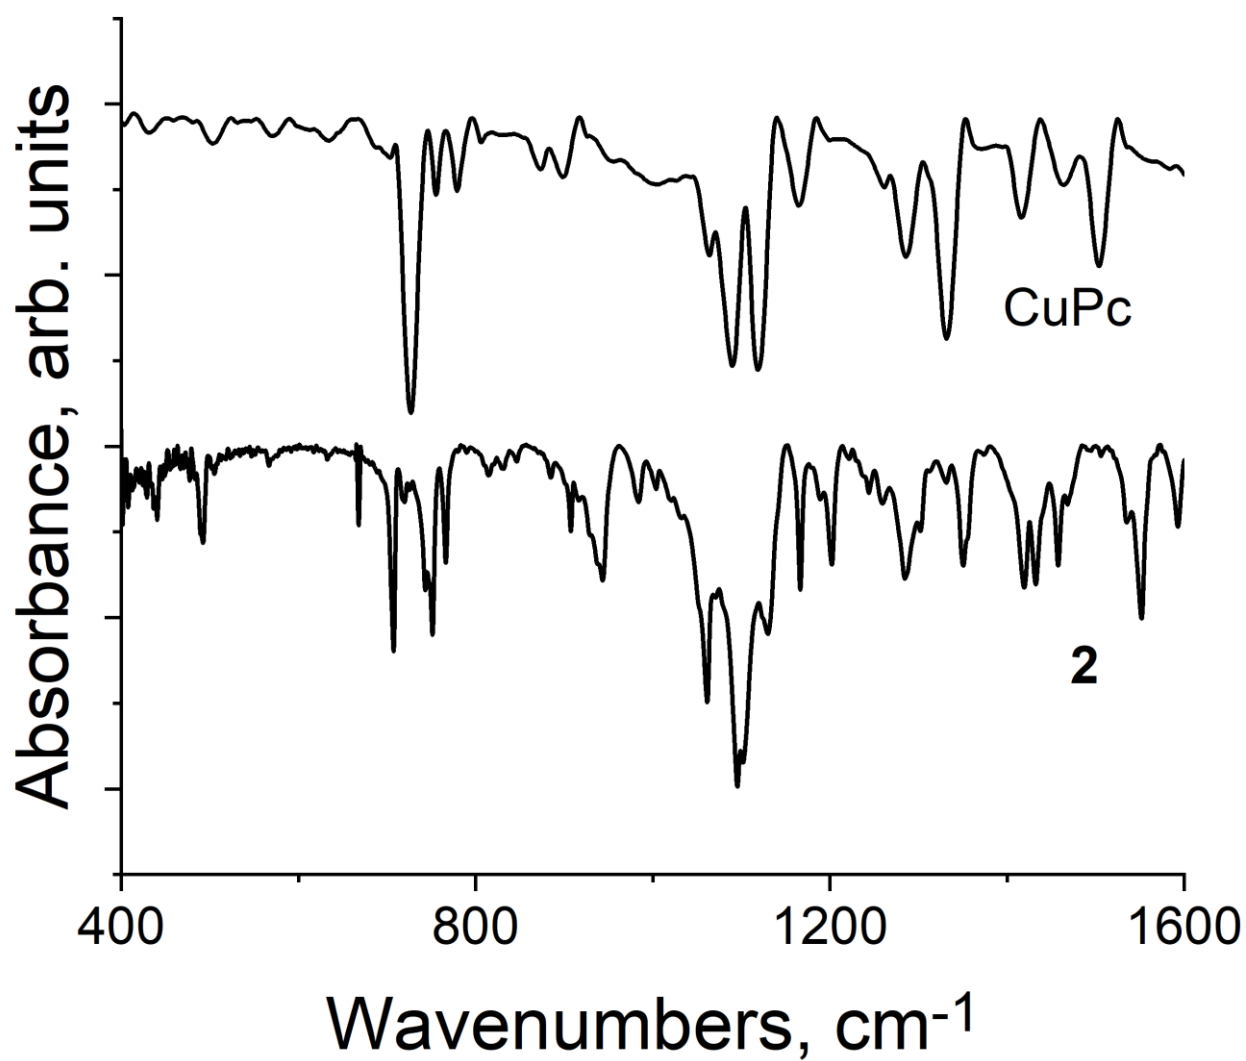

**Figure S2.** IR spectra of starting CuPc and complex **2** in KBr pellets prepared in anaerobic condition.

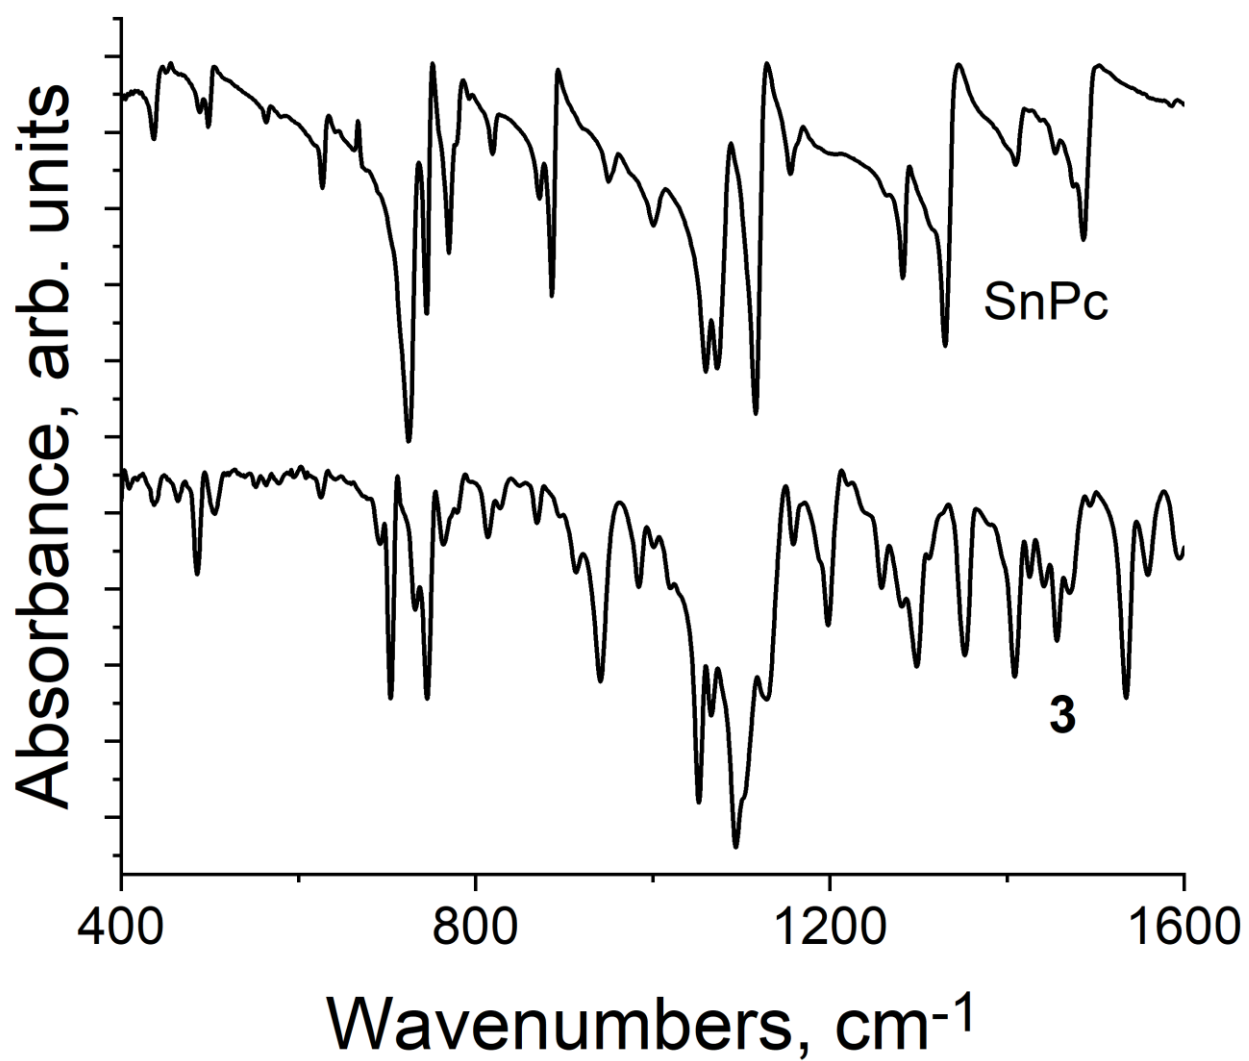

**Figure S3.** IR spectra of starting SnPc and complex **3** in KBr pellets prepared in anaerobic condition.

**Table S1.** IR spectra of starting metal phthalocyanines and complexes **1–3**.

| Components     | Cryptand(K <sup>+</sup> ) | V <sup>IV</sup> OPc | <b>1</b> | Cu <sup>II</sup> Pc | <b>2</b> | Sn <sup>II</sup> Pc | <b>3</b> |      |
|----------------|---------------------------|---------------------|----------|---------------------|----------|---------------------|----------|------|
| Phthalocyanine |                           | 439w                | 439w     | 727s                | 708s     | 435w                | -        |      |
|                |                           | 509w                | 495w*    | 755w                | 752s     | 498w                | 506w     |      |
|                |                           | 572w                | -        | 779w                | 767m     | 627w                | -        |      |
|                |                           | 639w                | -        | 899w                | 908w     | 725s                | 704m     |      |
|                |                           | 723sw               | 709s     | 1005w               | -        | 745m                | 732m*    |      |
|                |                           | -                   | 742m     | 1027w               | 1033w*   | 768m                | 745s     |      |
|                |                           | 755m                | 750m     | 1064m               | 1062s*   | 819w                | 814w     |      |
|                |                           | 776w                | 764w     | 1090s               | 1096s    | 887m                | 895w     |      |
|                |                           | 875w                | 884w     | 1119s               | 1120s    | 948w                | 941m     |      |
|                |                           | 899m                | -        | 1165m               | 1167m    | 1001w               | 1001w    |      |
|                |                           | 963w                | 958w     | 1261w               | -        | 1059s               | 1052s*   |      |
|                |                           | 1002s               | -        | 1286m               | 1285m*   | 1072s               | 1066s*   |      |
|                |                           | 1079s               | 1058s    | 1332s               | 1351m*   | 1114s               | 1129s    |      |
|                |                           | 1120s               | 1127s    | 1416m               | 1420m    | 1156w               | 1159w*   |      |
|                |                           | 1161w               | 1161w*   | 1464w               | 1458m*   | 1283m               | 1258w*   |      |
|                |                           | -                   | 1200m    | 1504m               | 1552s    | 1329s               | 1281m*   |      |
|                |                           | 1288m               | 1282w    | 1610w               | -        | 1407w               | 1409m    |      |
|                |                           | 1334s               | 1350m*   | 1861m               | -        | 1454w               | 1456m*   |      |
|                |                           | 1418w               | 1418m    | 1894m               | -        | 1486s               | 1471m*   |      |
|                |                           | 1464w               | 1457w*   |                     |          | 1613w               | 1606w    |      |
|                |                           | 1478w               | 1473w    |                     |          |                     |          |      |
|                |                           | 1498m               | -        |                     |          |                     |          |      |
|                |                           | 1610w               | 1599w    |                     |          |                     |          |      |
|                | Cryptand                  |                     |          | 495w*               |          |                     |          | 486w |
|                |                           | 476w                |          | -                   |          | 493m                |          | 506w |
| 528w           |                           |                     | 742m     |                     | -        |                     | -        |      |
| 581w           |                           |                     | 915w     |                     | -        |                     | 732m*    |      |
| 735m           |                           |                     | 1021w    |                     | 744m     |                     | 914w     |      |
| 922m           |                           |                     | 1069m    |                     | 938m     |                     | 1020w    |      |
| 1038w          |                           |                     | 1095s    |                     | 1033w*   |                     | 1066s*   |      |
| 1071m          |                           |                     | 1161w*   |                     | 1071s    |                     | 1094s    |      |
| 1100s          |                           |                     | 1259w    |                     | 1102s    |                     | 1159w*   |      |
| 1127s          |                           |                     | 1298m    |                     | 1130s    |                     | 1258w*   |      |
| 1213w          |                           |                     | 1316w    |                     | 1203m    |                     | 1281m*   |      |
| 1295m          |                           |                     | 1350m*   |                     | 1285m*   |                     | 1312w    |      |
| 1329m          |                           |                     | 1441w    |                     | -        |                     | 1352m    |      |
| 1360s          |                           |                     | 1457w*   |                     | 1351m*   |                     | 1456m*   |      |
| 1446m          |                           |                     | -        |                     | 1433m    |                     | 1471m*   |      |
| 1462m          |                           |                     | 1546m    |                     | 1458m*   |                     | -        |      |
| 1490w          |                           |                     | 2811w    |                     | -        |                     | 1535m    |      |
| -              |                           |                     | 2876w    |                     | 1535w    |                     | 2804w    |      |
| 2790w          |                           |                     | 2952w    |                     | -        |                     | 2870m    |      |
| 2877w          |                           |                     |          |                     | 2868w    |                     | 2949w    |      |
| 2943w          |                           |                     |          | 2886w               |          |                     |          |      |

\* - bands are coincided

w – weak intensity, m –middle intensity, s – strong intensity

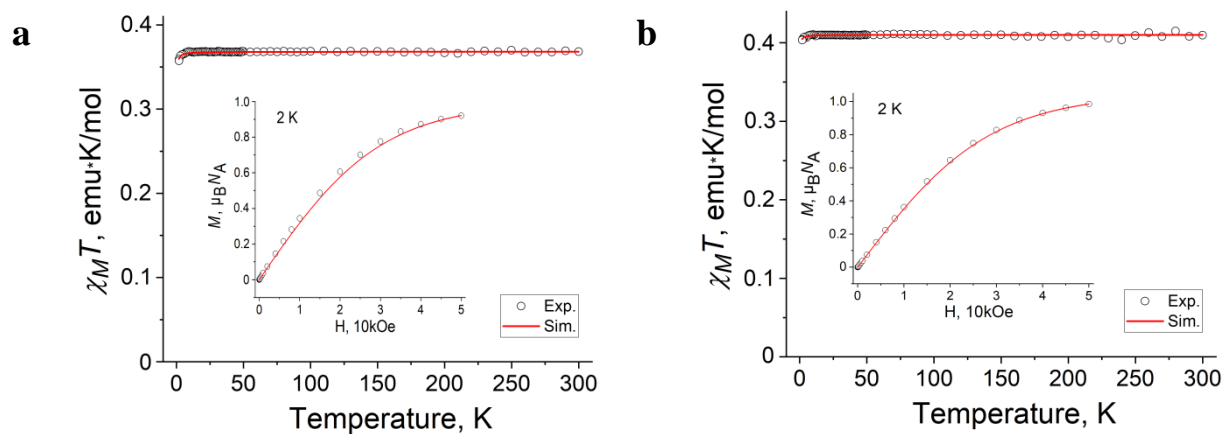

**Figure S4.** Temperature dependence of  $\chi_M T$  measured at  $H = 1$  kOe and magnetization vs. field measured at  $T = 2$  K (open circles) for **1** (a) and **2** (b). Theoretical curves (solid red lines) obtained with PHI program<sup>1</sup> using parameters presented in the text.

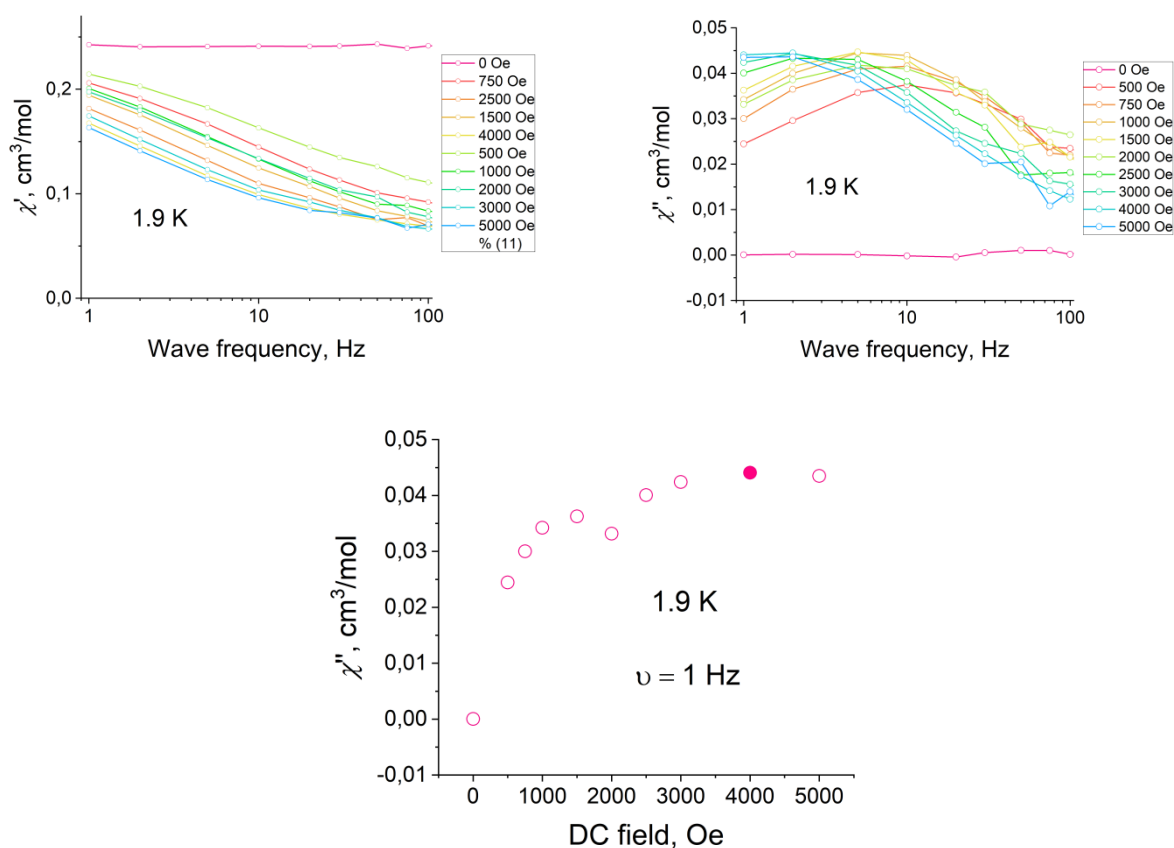

**Figure S5.** Frequency dependences of in-phase ( $\chi'$ ) (top right) and out-of-phase ( $\chi''$ ) (top left) AC susceptibility for **2** at different applied static magnetic fields  $H_{DC}$  and  $T = 2$  K. Field dependence of the out-of-phase ( $\chi''$ ) AC magnetic susceptibility at  $T = 1.9$  K and frequency of 1 Hz (bottom).

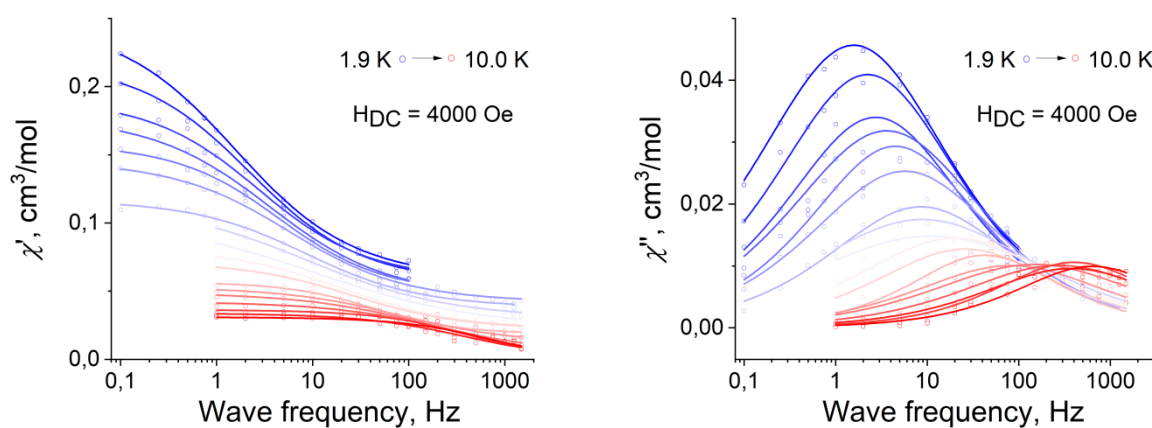

**Figure S6.** Frequency dependences of in-phase ( $\chi'$ ) (left) and out-of-phase ( $\chi''$ ) (right) AC magnetic susceptibilities for **2** at applied static magnetic field  $H_{DC} = 4000$  Oe and temperatures of 1.9 – 10.0 K. Solid lines represent the fitting of the data by the generalized Debye model.

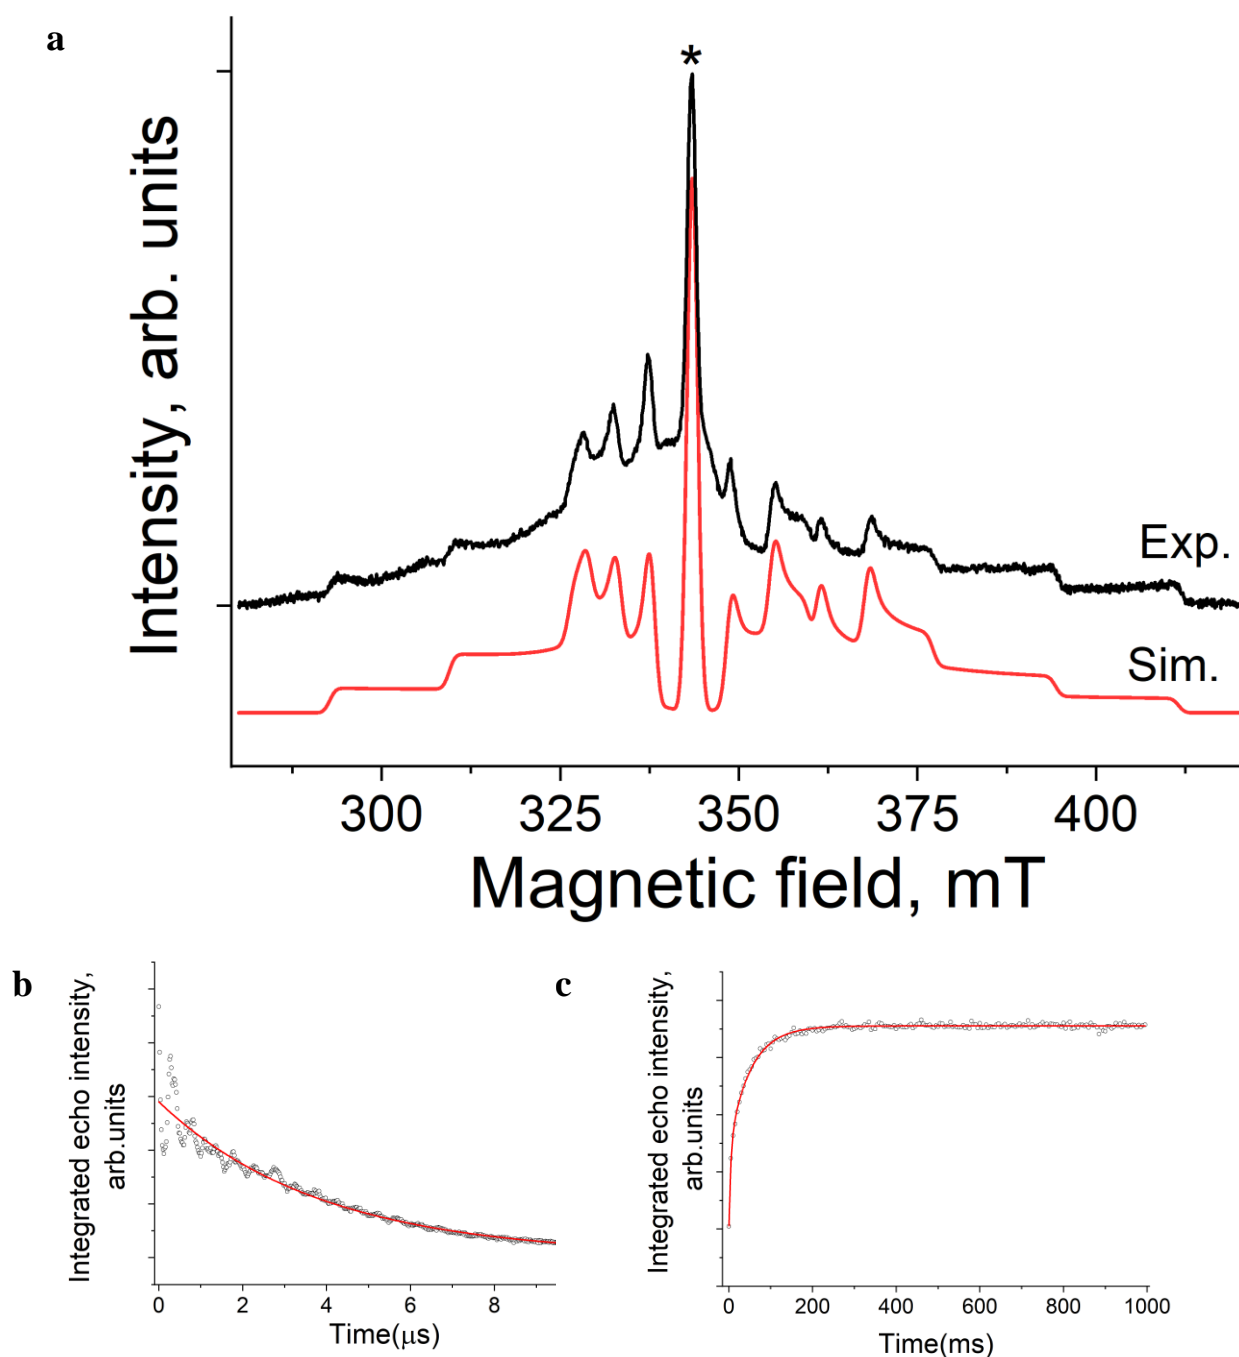

**Figure S7.** Glassy 1 mM toluene solution of **1**. (a) Echo detected X-band EPR spectrum at 10 K under microwave irradiation of 9.698 GHz (black), together with a simulation with parameters:  $g = [1.984; 1.966]$ ,  $A = [154; 467]$  MHz using EasySpin (red). The spectral position where the relaxation measurements were done (343.5 mT) is shown by asterisk (\*). (b) Pulsed EPR echo decay traces at 10 K (black), together with a fitting using exponential equation with  $T_m = 3.9 \mu\text{s}$  (red). (c) Time dependence of saturation recovery at 10 K (black), together with a fitting using biexponential equation with  $T_{1,1} = 51.1 \text{ ms}$  and  $T_{1,2} = 4.5 \text{ ms}$  (red).

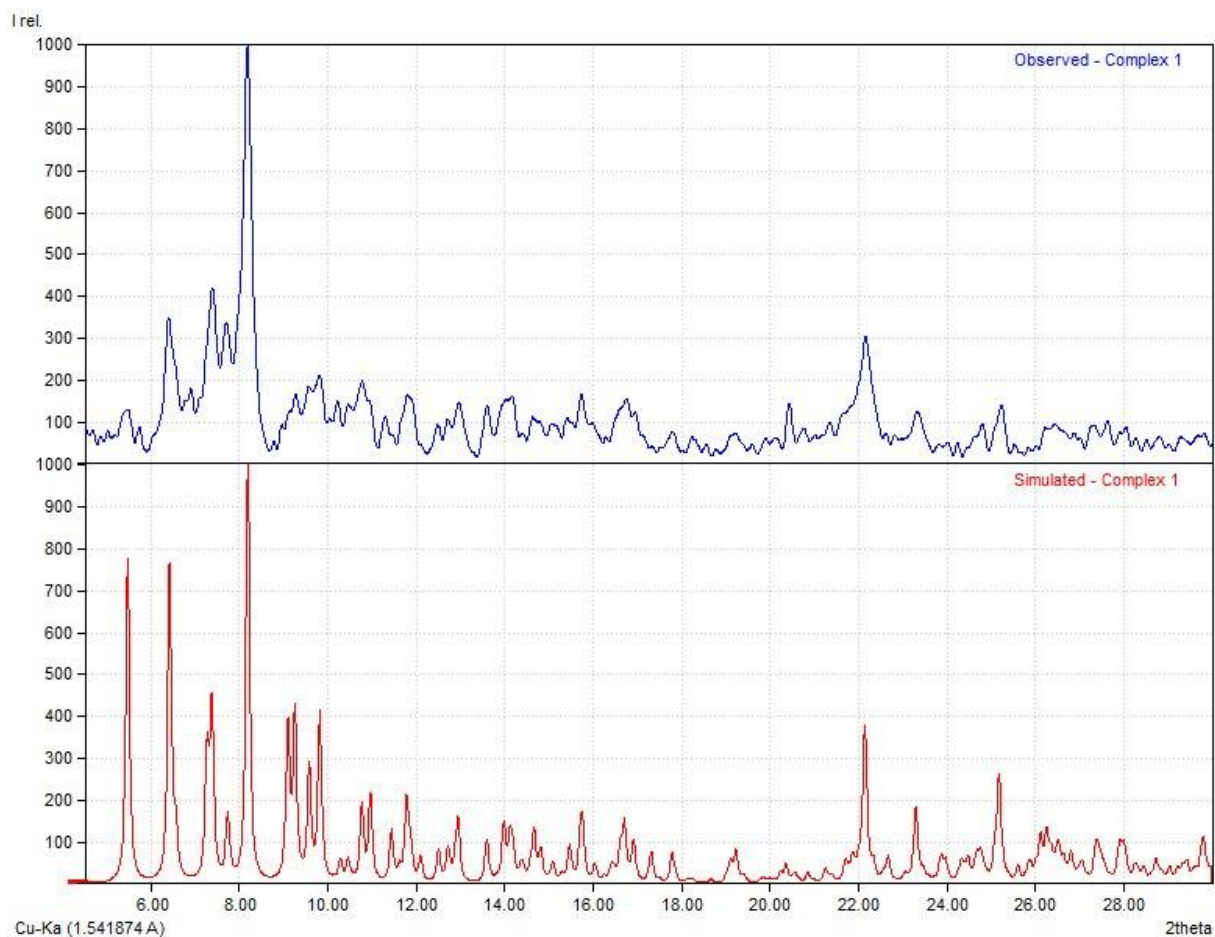

**Figure S8.** Powder X-ray diffraction pattern of polycrystalline sample of complex **1**: experimental (blue), and calculated from single crystal data (red).

## References

- (1) Chilton, N. F.; Anderson, R. P.; Turner, L. D.; Soncini, A.; Murray, K. S. PHI: A Powerful New Program for the Analysis of Anisotropic Monomeric and Exchange-Coupled Polynuclear *d* - and *f* -Block Complexes. *J. Comput. Chem.* **2013**, *34* (13), 1164–1175. <https://doi.org/10.1002/jcc.23234>.
